# Supplementary material for: Lifetime Risks of Valvular Heart Disease and Pacemaker Use in Patients With Ankylosing Spondylitis
Source: PubMed Central journal article supplement — J Am Heart Assoc. 2018 Oct 11;7(20):e010016. doi: 10.1161/JAHA.118.010016 (PMC6474959; doi:10.1161/jaha.118.010016), 2018-10-11
Supplement: JAH3-7-e010016-s001.pdf [file JAH3-7-e010016-s001.pdf]

# **SUPPLEMENTAL MATERIAL**

**Table S1. Incidence of mitral valve replacement in patients with ankylosing spondylitis (ASp) and control group without ankylosing spondylitis, by age group.**

|                 | Number of events |         | Incidence (per 100,000 patient-years)* |         | Relative risk (95% CI)*† |
|-----------------|------------------|---------|----------------------------------------|---------|--------------------------|
|                 | ASp              | Control | ASp                                    | Control |                          |
| Age 65 – 69     | 31               | 10984   | 37                                     | 26      | 1.38 (0.97, 1.98)        |
| Age 70 – 74     | 43               | 15535   | 45                                     | 38      | 1.19 (0.88, 1.61)        |
| Age 75 – 79     | 33               | 16731   | 36                                     | 48      | 0.74 (0.52, 1.05)        |
| Age 80 or older | 51               | 15298   | 39                                     | 31      | 1.24 (0.94, 1.64)        |

\* Race-standardized to the composition of the control group in each age-sex group.

† CI = confidence interval
